# Supplementary material
Source: HighWire-hosted journal article supplement (https://spcare.bmj.com/content/spcare-2023-004392)
Supplement: inline-supplementary-material-1 [file inline-supplementary-material-1.pdf]

## Appendix I

### ICES Databases and their use in this study

| ICES Databases                                                                 | Description                                                                                                                                                                                                                                                                                                                                                                        | Study variables                                                                                                                                   |
|--------------------------------------------------------------------------------|------------------------------------------------------------------------------------------------------------------------------------------------------------------------------------------------------------------------------------------------------------------------------------------------------------------------------------------------------------------------------------|---------------------------------------------------------------------------------------------------------------------------------------------------|
| Client Agency Program Enrolment (CAPE) Database                                | CAPE provides information on primary care physicians' care organization and remuneration model. This data was provided by the (former) Ontario Ministry of Health and Long-Term Care (MOHLTC).                                                                                                                                                                                     | Physician remuneration for capitation-based models                                                                                                |
| Continuing Care Reporting System (CCRS)                                        | CCRS is updated quarterly and contains demographic, administrative, clinical and resource utilization information on those in continuing care services in hospitals or long-term care homes.                                                                                                                                                                                       | Identifying institutional deaths in long-term care                                                                                                |
| Corporate Provider Database (CPDB)                                             | CPBD provides practice information on providers' practice characteristics in Ontario. This data is updated quarterly.                                                                                                                                                                                                                                                              | Physician group practice and remuneration model                                                                                                   |
| Discharge Abstract Database (DAD)                                              | The DAD includes information on all hospitalizations based on a retrospective chart review including International Classification of Diseases-10 (ICD-10) diagnoses codes (up to 16 diagnoses codes for each discharge record), procedures performed during hospitalization, physician providing care, hospital administrative information, and patients' demographic information. | Hospitalizations and hospital deaths                                                                                                              |
| Drug Identification Number (DIN) database                                      | The DIN provides information on drugs administered in Ontario for controlled substances and for patients eligible for publicly covered benefits.                                                                                                                                                                                                                                   | Medication claims<br>Chronic conditions - multimorbidity score                                                                                    |
| Home Care Database (HCD)                                                       | The HCD provides clinical information for planning and reporting, information on assessments, admission to programs and service records.                                                                                                                                                                                                                                           | Cohort creation – those who were enrolled in home care                                                                                            |
| Inter Resident Assessment Instrument (RAI) - Home Care Source (HSSO) – (RAIHC) | The Inter RAI-HC, included information from January 2018 and is a standardized clinical assessment that collects clinical and caregiver information for patients living at home with formal services.                                                                                                                                                                              | Detailed clinical and caregiver information for sensitivity analyses                                                                              |
| Local Health Integration Network (LHIN) data                                   | The LHIN provides health service availability and the geographic bounds of the designated LHINs in Ontario.                                                                                                                                                                                                                                                                        | Geographic distribution                                                                                                                           |
| National Ambulatory Care Reporting System (NACRS)                              | The NACRS holds data on visits to healthcare institutions. This includes demographics, the setting visited (e.g., day surgery, emergency department, cancer care unit), and clinical data (e.g., diagnosis, treatment).                                                                                                                                                            | Emergency department visits and institutional deaths                                                                                              |
| Ontario Health Insurance Plan (OHIP) Claims Database                           | The OHIP database holds all billing claims paid for by the Ontario Health Insurance Plan. Each record represents the delivery of a service from a particular physician to a particular patient and includes the date, the fee paid, and the number of times it was billed.                                                                                                         | Home visit delivery (primary outcome), billing percentage - palliative care designation, institutional deaths in designated Palliative Care Unit. |

|                                                              |                                                                                                                                                                                                                                                                                                                                              |                                                                                                                                            |
|--------------------------------------------------------------|----------------------------------------------------------------------------------------------------------------------------------------------------------------------------------------------------------------------------------------------------------------------------------------------------------------------------------------------|--------------------------------------------------------------------------------------------------------------------------------------------|
| Ontario Drug Benefits (ODB)                                  | The ODB provides information on drugs administered in Ontario to patients eligible for publicly covered benefits (those <25 or >65 years of age or eligible for disability).                                                                                                                                                                 | Medication claims<br>Chronic conditions - multimorbidity score                                                                             |
| Registered Persons Database (RPDB)                           | The RPDB holds information on each individual who has ever had an active Ontario health card number. This data was provided by the (former) Ministry of Health and Long-Term Care (MOHLTC). The most relevant information in this dataset are demographic information, geographic information, and eligibility of OHIP coverage.             | Age, sex, postal code, death information                                                                                                   |
| Statistics Canada - Postal Code Conversion File Plus (PCCF+) | This is an ICES derived macro designed to link PCCF files to other census geographic identifiers and was used to create urban/rural flags, neighbourhood income quintiles, dissemination area/enumeration area, census division, and latitude/longitude. This macro is updated according to changes in census data from which it is derived. | Converts postal code from the RPDB to determine:<br>Rurality, Income quintile, Census division, LHIN, population size of practice location |

## Appendix II

### The billing fee codes used to identify a physician home visit from the Ontario Health Insurance Plan (OHIP) database

| OHIP codes | Description                                                                                                                     |
|------------|---------------------------------------------------------------------------------------------------------------------------------|
| A900       | Complex house call assessment (frail elderly or housebound patients)                                                            |
| A901*      | House call assessment (usually billed with B997 or B998)                                                                        |
| B960       | Travel premium for Special Visits to Patient's Home: Weekdays Daytime (07:00- 17:00) Nonelective OR Elective home visit         |
| B961       | Travel premium for Special Visits to Patient's Home: Weekdays Daytime (07:00- 17:00) with Sacrifice of Office Hours Nonelective |
| B962       | Travel premium for Special Visits to Patient's Home: Evenings (17:00- 24:00) Monday through Friday Nonelective                  |
| B963       | Travel premium for Special Visits to Patient's Home: Sat., Sun. and Holidays (07:00- 24:00) Nonelective                         |
| B964       | Travel premium for Special Visits to Patient's Home: Nights (00:00- 07:00) Nonelective                                          |
| B966       | Travel premium-palliative care home visit                                                                                       |
| B990       | Special visit to patient's home, weekday/daytime                                                                                |
| B992       | Special visit to patient's home, weekday/daytime, sacrifice office hours                                                        |
| B993       | Special Visits to Patient's Home (other than Long-Term Care Institution), weekends and holidays (non-elective)                  |
| B994       | Special visit to patient's home, non-elective, evening hours                                                                    |
| B996       | Special visit to patient's home, night time (first patient)                                                                     |
| B998       | Special visit to patient's home, palliative care, days, evenings (from 2005)                                                    |
| B986       | Travel premium for a geriatric home visit                                                                                       |
| B987       | Geriatric home visit during the night (00:00- 07:00) (first patient)                                                            |
| B988       | Geriatric home visit to patient's home on days, evenings, and holidays (07:00-24:00) (first patient)                            |

Legend: OHIP=Ontario Health Insurance Plan,

\*Removed from the Schedule of Benefits – effective October 1, 2019

## Appendix III

### Home-based symptom management claims: common end-of-life symptoms and their respective pharmacological treatments captured in the Ontario Drug Benefits (ODB) database and the Drug Identification Number (DIN) database

| Pain Management                | Drug Identification Numbers                                                                                                                                                                                                                                                                                                                                                                                                                             |
|--------------------------------|---------------------------------------------------------------------------------------------------------------------------------------------------------------------------------------------------------------------------------------------------------------------------------------------------------------------------------------------------------------------------------------------------------------------------------------------------------|
| Morphine (injectable)          | 00392561,00392588,00617288,02242484,09857226,09857227                                                                                                                                                                                                                                                                                                                                                                                                   |
| Morphine (oral)                | 00614505,00690783,00591467,00591475,00607762,00607770,00614491,00621935,00690791                                                                                                                                                                                                                                                                                                                                                                        |
| Hydromorphone (oral)           | 00786535,01916386                                                                                                                                                                                                                                                                                                                                                                                                                                       |
| Hydromorphone (injectable):    | 02145901,02145928,02145936,02146126                                                                                                                                                                                                                                                                                                                                                                                                                     |
| Acetaminophen (oral)           | 02027801                                                                                                                                                                                                                                                                                                                                                                                                                                                |
| Acetaminophen + codeine (oral) | 00816027                                                                                                                                                                                                                                                                                                                                                                                                                                                |
| Dexamethasone (oral):          | 00042560                                                                                                                                                                                                                                                                                                                                                                                                                                                |
| Dexamethasone (injectable):    | 00664227, 01977547                                                                                                                                                                                                                                                                                                                                                                                                                                      |
| Fentanyl (transdermal):        | 02282941,02282968,02282976,02282984,02314630,02314649,02314657,02314665,02341387,02341395,02341409,02341417,02275856,02327120,02327147,02327155,02327163,02330113,02330121,02330148,02330156,02386852,02386879,02386887,02396718,02396726,02396734,02396742,09857577,09857579,09857580,09857581,09857582,09857584,09857585,09857587,09857588,09857589,09857590,09857592, 02386844, 02275848, 01937413, 02280345, 01937405, 02341379, 02327112, 02311925 |
| <b>Delirium/agitation</b>      |                                                                                                                                                                                                                                                                                                                                                                                                                                                         |
| Lorazepam (injectable)         | 02243278,09857216                                                                                                                                                                                                                                                                                                                                                                                                                                       |
| Lorazepam (sublingual)         | 02041464,02410753,00637742,00637750,00655740,00655759,00655767,00711101,00728187,00728195,00728209,02041413,02041421,02041448,02041456,02041472,02410761,02410745                                                                                                                                                                                                                                                                                       |
| Midazolam (injectable)         | 02240286,09857225,02242905,09857436,09857438,09857479                                                                                                                                                                                                                                                                                                                                                                                                   |
| Haloperidol (injectable)       | 02130297,02130300,09853758,00808652                                                                                                                                                                                                                                                                                                                                                                                                                     |
| Phenobarbital (injectable)     | 02304090,09857296                                                                                                                                                                                                                                                                                                                                                                                                                                       |
| Phenobarbital (oral)           | 00645575                                                                                                                                                                                                                                                                                                                                                                                                                                                |
| Methotrimeprazine (injectable) | 01927698                                                                                                                                                                                                                                                                                                                                                                                                                                                |
| Olanzapine (ODT, sublingual)   | 02243086,02243087,02243088,02303191,02303205,02303213,02321343,02321351,02321378,02327562,02327570,02327589,02327775,02327783,02327791,02360616,02360624,02360632,02382709,02382717,02382725,02389088,02389096,02389118,02406624,02406632,02406640,02414090,02414104,02414112,02436965,02436973,02436981,02448726,02448734,02448742,02327597,02360640,02448750,02406659,02389126,02437007,02327805,02414120,02243089                                    |

| <b>Terminal Secretions/nausea</b> |                                                                                           |
|-----------------------------------|-------------------------------------------------------------------------------------------|
| Scopolamine (injectable)          | 09857384,09857385,00363839,09857213,00541869,00541877,02242810,02242811,09857236,09857237 |
| Glycopyrrolate (injectable)       | 02039508,02382857,09857212,09857266,09857521                                              |
| Metoclopramide (injectable)       | 02185431, 09857224                                                                        |
| Metoclopramide (oral)             | 02230433                                                                                  |
| Furosemide (injectable)           | 00527033, 09857208                                                                        |
| Furosemide (oral)                 | 02224720                                                                                  |
| Atropine (sublingual)             | 00035017,02023695                                                                         |

## Appendix IV

### Cohort Creation Flowchart

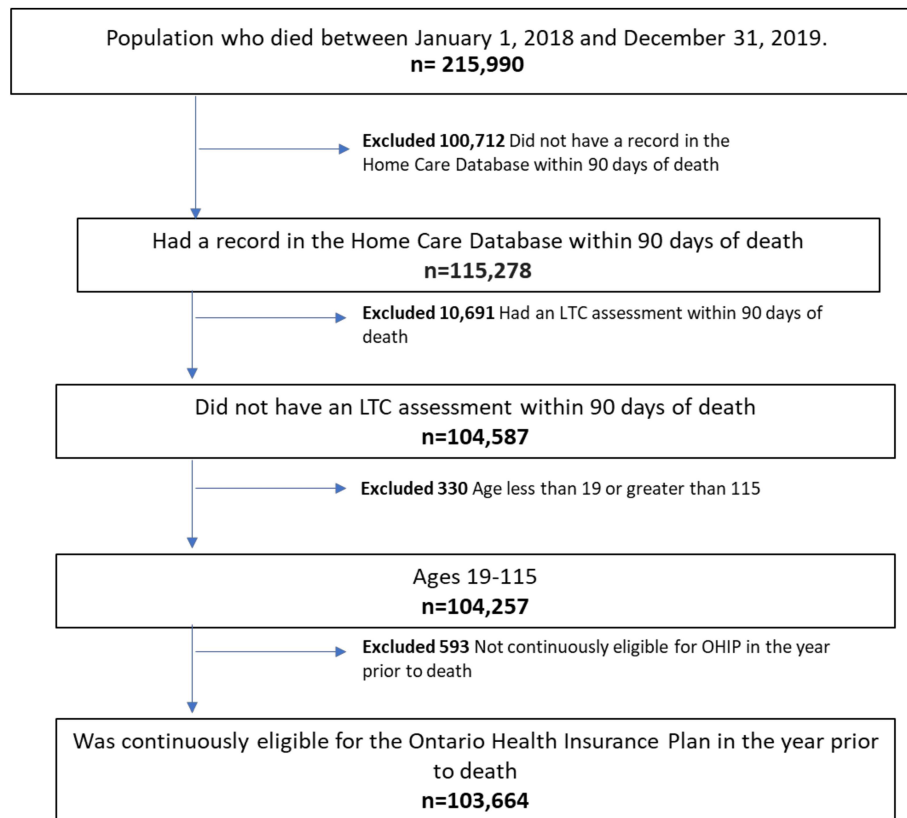

## Appendix V

Sensitivity analysis using clinical and caregiver variables based on the sub-set of the cohort of decedents who died between January 1, 2018 and December 31, 2019 who received formal home care services in their last 90 days of life with completed Resident Assessment Instrument (RAI) home care assessments.

**Table 1: Baseline characteristics of the patients with a complete RAI home care assessment**

| Patient characteristic              |                                     | No home visit from NP or MD | Home visit from only NPs | Home visit from only MD | Home visit from both NP & MD | Total         |
|-------------------------------------|-------------------------------------|-----------------------------|--------------------------|-------------------------|------------------------------|---------------|
|                                     | Overall                             | N=9,972                     | N=499                    | N=5,262                 | N=574                        | N=16,307      |
| Sex                                 | Female                              | 4,897 (49.1%)               | 249 (49.9%)              | 2,825 (53.7%)           | 319 (55.6%)                  | 8,290 (50.8%) |
|                                     | Male                                | 5,075 (50.9%)               | 250 (50.1%)              | 2,437 (46.3%)           | 255 (44.4%)                  | 8,017 (49.2%) |
| Age (years)                         | Mean (SD)                           | 80.95 (11.34)               | 79.04 (12.02)            | 83.13 (11.00)           | 81.14 (11.52)                | 81.60 (11.32) |
|                                     | Median (Q1-Q3)                      | 83 (74-89)                  | 81 (72-88)               | 85 (78-91)              | 83 (75-89)                   | 84 (75-90)    |
|                                     | 18-44                               | 62 (0.6%)                   | 4 (0.8%)                 | 24 (0.5%)               | 6 (1.0%)                     | 96 (0.6%)     |
|                                     | 45-54                               | 180 (1.8%)                  | 15 (3.0%)                | 77 (1.5%)               | 9 (1.6%)                     | 281 (1.7%)    |
|                                     | 55-64                               | 654 (6.6%)                  | 44 (8.8%)                | 243 (4.6%)              | 37 (6.4%)                    | 978 (6.0%)    |
|                                     | 65-74                               | 1,625 (16.3%)               | 99 (19.8%)               | 690 (13.1%)             | 91 (15.9%)                   | 2,505 (15.4%) |
|                                     | 75-84                               | 3,003 (30.1%)               | 151 (30.3%)              | 1,408 (26.8%)           | 177 (30.8%)                  | 4,739 (29.1%) |
|                                     | 85-94                               | 3,704 (37.1%)               | 153 (30.7%)              | 2,245 (42.7%)           | 208 (36.2%)                  | 6,310 (38.7%) |
|                                     | 95+                                 | 744 (7.5%)                  | 33 (6.6%)                | 575 (10.9%)             | 46 (8.0%)                    | 1,398 (8.6%)  |
| Rurality, and Urban Income quintile | Missing postal code                 | 32 (0.3%)                   | 1 (0.2%)                 | 16 (0.3%)               | 1 (0.2%)                     | 50 (0.3%)     |
|                                     | Rural                               | 1,420 (14.2%)               | 114 (22.8%)              | 654 (12.4%)             | 85 (14.8%)                   | 2,273 (13.9%) |
|                                     | Urban income quintile - 1           | 2,416 (24.2%)               | 84 (16.8%)               | 1,077 (20.5%)           | 119 (20.7%)                  | 3,696 (22.7%) |
|                                     | Urban income quintile - 2           | 1,948 (19.5%)               | 77 (15.4%)               | 1,081 (20.5%)           | 104 (18.1%)                  | 3,210 (19.7%) |
|                                     | Urban income quintile - 3           | 1,630 (16.3%)               | 90 (18.0%)               | 864 (16.4%)             | 87 (15.2%)                   | 2,671 (16.4%) |
|                                     | Urban income quintile - 4           | 1,335 (13.4%)               | 65 (13.0%)               | 845 (16.1%)             | 90 (15.7%)                   | 2,335 (14.3%) |
|                                     | Urban income quintile - 5           | 1,189 (11.9%)               | 68 (13.6%)               | 724 (13.8%)             | 88 (15.3%)                   | 2,069 (12.7%) |
|                                     | Urban- Missing Income - n (%)       | 2 (0.0%)                    | 0 (0.0%)                 | 1 (0.0%)                | 0 (0.0%)                     | 3 (0.0%)      |
| LHIN                                | Missing                             | 1 (0.0%)                    | 0 (0.0%)                 | 0 (0.0%)                | 0 (0.0%)                     | 1 (0.0%)      |
|                                     | 1- Erie St. Clair                   | 500 (5.0%)                  | 100 (20.0%)              | 180 (3.4%)              | 120 (20.9%)                  | 900 (5.5%)    |
|                                     | 2- South West                       | 809 (8.1%)                  | 36 (7.2%)                | 386 (7.3%)              | 57 (9.9%)                    | 1,288 (7.9%)  |
|                                     | 3- Waterloo Wellington              | 393 (3.9%)                  | 12 (2.4%)                | 202 (3.8%)              | 30 (5.2%)                    | 637 (3.9%)    |
|                                     | 4- Hamilton Niagara Haldimand Brant | 1,310 (13.1%)               | 40 (8.0%)                | 563 (10.7%)             | 56 (9.8%)                    | 1,969 (12.1%) |

|                             |                            |               |             |               |             |                |
|-----------------------------|----------------------------|---------------|-------------|---------------|-------------|----------------|
|                             | 5- Central West            | 360 (3.6%)    | 23 (4.6%)   | 264 (5.0%)    | 29 (5.1%)   | 676 (4.1%)     |
|                             | 6- Mississauga Halton      | 557 (5.6%)    | 52 (10.4%)  | 293 (5.6%)    | 64 (11.1%)  | 966 (5.9%)     |
|                             | 7- Toronto Central         | 571 (5.7%)    | 8 (1.6%)    | 453 (8.6%)    | 14 (2.4%)   | 1,046 (6.4%)   |
|                             | 8- Central                 | 935 (9.4%)    | 25 (5.0%)   | 792 (15.1%)   | 57 (9.9%)   | 1,809 (11.1%)  |
|                             | 9- Central East            | 1,778 (17.8%) | 69 (13.8%)  | 854 (16.2%)   | 39 (6.8%)   | 2,740 (16.8%)  |
|                             | 10- South East             | 631 (6.3%)    | 31 (6.2%)   | 374 (7.1%)    | 38 (6.6%)   | 1,074 (6.6%)   |
|                             | 11- Champlain              | 827 (8.3%)    | 16 (3.2%)   | 422 (8.0%)    | 30 (5.2%)   | 1,295 (7.9%)   |
|                             | 12- North Simcoe Muskoka   | 385 (3.9%)    | 7 (1.4%)    | 272 (5.2%)    | 18 (3.1%)   | 682 (4.2%)     |
|                             | 13- North East             | 647 (6.5%)    | 39 (7.8%)   | 177 (3.4%)    | 15 (2.6%)   | 878 (5.4%)     |
|                             | 14- North West             | 268 (2.7%)    | 41 (8.2%)   | 30 (0.6%)     | 7 (1.2%)    | 346 (2.1%)     |
| Comorbidities               | AMI                        | 257 (2.6%)    | 14 (2.8%)   | 108 (2.1%)    | 8 (1.4%)    | 387 (2.4%)     |
|                             | Coronary                   | 4,365 (43.8%) | 196 (39.3%) | 2,236 (42.5%) | 238 (41.5%) | 7,035 (43.1%)  |
|                             | CHF                        | 3,954 (39.7%) | 166 (33.3%) | 2,032 (38.6%) | 192 (33.4%) | 6,344 (38.9%)  |
|                             | Hypertension               | 8,436 (84.6%) | 391 (78.4%) | 4,432 (84.2%) | 464 (80.8%) | 13,723 (84.2%) |
|                             | Heart Diseases             | 8,855 (88.8%) | 410 (82.2%) | 4,659 (88.5%) | 485 (84.5%) | 14,409 (88.4%) |
|                             | Arrythmia                  | 2,934 (29.4%) | 119 (23.8%) | 1,606 (30.5%) | 143 (24.9%) | 4,802 (29.4%)  |
|                             | COPD                       | 2,653 (26.6%) | 145 (29.1%) | 1,351 (25.7%) | 124 (21.6%) | 4,273 (26.2%)  |
|                             | Asthma                     | 1,751 (17.6%) | 76 (15.2%)  | 940 (17.9%)   | 95 (16.6%)  | 2,862 (17.6%)  |
|                             | Respiratory Diseases       | 3,447 (34.6%) | 180 (36.1%) | 1,772 (33.7%) | 169 (29.4%) | 5,568 (34.1%)  |
|                             | Cancer                     | 3,752 (37.6%) | 280 (56.1%) | 2,322 (44.1%) | 324 (56.4%) | 6,678 (41.0%)  |
|                             | Dementia                   | 2,862 (28.7%) | 112 (22.4%) | 1,601 (30.4%) | 129 (22.5%) | 4,704 (28.8%)  |
|                             | Diabetes                   | 4,382 (43.9%) | 196 (39.3%) | 2,077 (39.5%) | 244 (42.5%) | 6,899 (42.3%)  |
|                             | Mental Health Conditions   | 3,658 (36.7%) | 150 (30.1%) | 1,764 (33.5%) | 172 (30.0%) | 5,744 (35.2%)  |
|                             | Mood and anxiety disorders | 5,512 (55.3%) | 249 (49.9%) | 2,933 (55.7%) | 311 (54.2%) | 9,005 (55.2%)  |
|                             | Osteoarthritis             | 7,272 (72.9%) | 344 (68.9%) | 3,938 (74.8%) | 427 (74.4%) | 11,981 (73.5%) |
|                             | Osteoporosis               | 1,377 (13.8%) | 72 (14.4%)  | 861 (16.4%)   | 89 (15.5%)  | 2,399 (14.7%)  |
|                             | Renal failure              | 3,407 (34.2%) | 135 (27.1%) | 1,631 (31.0%) | 169 (29.4%) | 5,342 (32.8%)  |
|                             | Rheumatoid Arthritis       | 406 (4.1%)    | 16 (3.2%)   | 195 (3.7%)    | 23 (4.0%)   | 640 (3.9%)     |
|                             | Stroke                     | 668 (6.7%)    | 25 (5.0%)   | 335 (6.4%)    | 39 (6.8%)   | 1,067 (6.5%)   |
| Count of chronic conditions | Mean (SD)                  | 5.78 (2.35)   | 5.38 (2.36) | 5.77 (2.34)   | 5.56 (2.37) | 5.76 (2.35)    |
|                             | Missing                    | 3 (0.0%)      | 3 (0.6%)    | 4 (0.1%)      | 1 (0.2%)    | 11 (0.1%)      |



|                                                                                          |                             |               |             |               |             |               |
|------------------------------------------------------------------------------------------|-----------------------------|---------------|-------------|---------------|-------------|---------------|
| Changes in Health, End-Stage Disease, Signs and Symptoms Scale (i.e. health instability) | 0 – No                      | 822 (8.2%)    | 17 (3.4%)   | 335 (6.4%)    | 27 (4.7%)   | 1,201 (7.4%)  |
|                                                                                          | 1 – Minimal                 | 1,779 (17.8%) | 58 (11.6%)  | 769 (14.6%)   | 53 (9.2%)   | 2,659 (16.3%) |
|                                                                                          | 2 – Low                     | 2,803 (28.1%) | 109 (21.8%) | 1,293 (24.6%) | 94 (16.4%)  | 4,299 (26.4%) |
|                                                                                          | 3 – Moderate                | 2,775 (27.8%) | 144 (28.9%) | 1,462 (27.8%) | 183 (31.9%) | 4,564 (28.0%) |
|                                                                                          | 4 – High                    | 1,581 (15.9%) | 116 (23.2%) | 1,124 (21.4%) | 157 (27.4%) | 2,978 (18.3%) |
|                                                                                          | 5 – Very High               | 209 (2.1%)    | 52 (10.4%)  | 275 (5.2%)    | 59 (10.3%)  | 595 (3.6%)    |
| Activities of Daily Living (ADL) Hierarchy scale                                         | 0 – Independent             | 2,448 (24.5%) | 134 (26.9%) | 895 (17.0%)   | 124 (21.6%) | 3,601 (22.1%) |
|                                                                                          | 1 – Supervision             | 987 (9.9%)    | 38 (7.6%)   | 466 (8.9%)    | 43 (7.5%)   | 1,534 (9.4%)  |
|                                                                                          | 2 – Limited                 | 1,788 (17.9%) | 81 (16.2%)  | 860 (16.3%)   | 96 (16.7%)  | 2,825 (17.3%) |
|                                                                                          | 3 – Extensive               | 1,879 (18.8%) | 80 (16.0%)  | 958 (18.2%)   | 105 (18.3%) | 3,022 (18.5%) |
|                                                                                          | 4 – Maximal                 | 1,209 (12.1%) | 65 (13.0%)  | 804 (15.3%)   | 65 (11.3%)  | 2,143 (13.1%) |
|                                                                                          | 5 – Dependent               | 1,330 (13.3%) | 73 (14.6%)  | 941 (17.9%)   | 93 (16.2%)  | 2,437 (14.9%) |
|                                                                                          | 6 – Total dependence        | 331 (3.3%)    | 28 (5.6%)   | 338 (6.4%)    | 48 (8.4%)   | 745 (4.6%)    |
| Cognitive Performance Scale (i.e., Cognition)                                            | 0 – Intact                  | 1,594 (16.0%) | 118 (23.6%) | 751 (14.3%)   | 131 (22.8%) | 2,594 (15.9%) |
|                                                                                          | 1 – Borderline intact       | 1,413 (14.2%) | 75 (15.0%)  | 686 (13.0%)   | 105 (18.3%) | 2,279 (14.0%) |
|                                                                                          | 2 – Mild                    | 4,199 (42.1%) | 178 (35.7%) | 2,188 (41.6%) | 195 (34.0%) | 6,760 (41.5%) |
|                                                                                          | 3 – Moderate                | 1,305 (13.1%) | 52 (10.4%)  | 653 (12.4%)   | 50 (8.7%)   | 2,060 (12.6%) |
|                                                                                          | 4 – Moderate Severe         | 218 (2.2%)    | 12 (2.4%)   | 109 (2.1%)    | 13 (2.3%)   | 352 (2.2%)    |
|                                                                                          | 5 – Severe                  | 934 (9.4%)    | 35 (7.0%)   | 577 (11.0%)   | 46 (8.0%)   | 1,592 (9.8%)  |
|                                                                                          | 6 – Very severe             | 309 (3.1%)    | 29 (5.8%)   | 298 (5.7%)    | 34 (5.9%)   | 670 (4.1%)    |
| Two Key Informal Helpers - Lives With Person - Primary                                   | 0 – No                      | 4,301 (43.1%) | 163 (32.7%) | 2,273 (43.2%) | 207 (36.1%) | 6,944 (42.6%) |
|                                                                                          | 1 – Yes, 6 months or less   | 442 (4.4%)    | 34 (6.8%)   | 279 (5.3%)    | 26 (4.5%)   | 781 (4.8%)    |
|                                                                                          | 2 – Yes, more than 6 months | 4,935 (49.5%) | 294 (58.9%) | 2,607 (49.5%) | 334 (58.2%) | 8,170 (50.1%) |
|                                                                                          | 8 – No informal helper      | 294 (2.9%)    | 8 (1.6%)    | 103 (2.0%)    | 7 (1.2%)    | 412 (2.5%)    |
| Informal Helper Status-Primary Informal Helper Expresses Feelings of Distress, A         | Yes                         | 4,103 (41.1%) | 201 (40.3%) | 2,282 (43.4%) | 232 (40.4%) | 6,818 (41.8%) |

Legend: MD=Physician, NP= Nurse Practitioner, SD=Standard Deviation, LHIN=Local Health Integration network, AMI = Acute Myocardial Infarction, CHF=Congestive Heart Failure, COPD=Chronic Obstructive Pulmonary Disease, ADL=Activities of Daily Living,

**Table 2: Results of Sensitivity Analysis Regression Modelling on subset of cohort with an interRAI assessment completed within 90 days to include additional clinical and caregiver covariates\***

|                               | <b>Nested Model – Clinical characteristics added to base model</b> | <b>Final Model – Nested model + caregiver variables</b> |
|-------------------------------|--------------------------------------------------------------------|---------------------------------------------------------|
| <b>Exposure</b>               | <b>Odds Ratio [95% CI]</b>                                         | <b>Odds Ratio [95% CI]</b>                              |
| <b>Death in the Community</b> |                                                                    |                                                         |
| Only NP                       | 3.23 [2.56-4.07]                                                   | 3.24 [2.57-4.09]                                        |
| Only FP                       | 3.41 [3.12-3.72]                                                   | 3.40 [3.11-3.71]                                        |
| Both NP and FP                | 5.99 [4.63-7.75]                                                   | 6.01 [4.64-7.78]                                        |
|                               |                                                                    |                                                         |
| <b>Hospitalization</b>        |                                                                    |                                                         |
| Only NP                       | 0.68 [0.54-0.86]                                                   | 0.68 [0.54-0.86]                                        |
| Only FP                       | 0.62 [0.57-0.68]                                                   | 0.62 [0.57-0.68]                                        |
| Both NP and FP                | 0.44 [0.33-0.60]                                                   | 0.44 [0.33-0.60]                                        |
|                               |                                                                    |                                                         |
| <b>ED visits</b>              |                                                                    |                                                         |
| Only NP                       | 0.86 [0.63-1.16]                                                   | 0.85 [0.63-1.16]                                        |
| Only FP                       | 0.91 [0.80-1.01]                                                   | 0.90 [0.80-1.02]                                        |
| Both NP and FP                | 0.71 [0.46-1.08]                                                   | 0.70 [0.46-1.08]                                        |
|                               |                                                                    |                                                         |
| <b>Symptom Management</b>     |                                                                    |                                                         |
| Only NP                       | 2.52 [2.00-3.17]                                                   | 2.52 [1.99-3.17]                                        |
| Only FP                       | 2.06 [1.87-2.27]                                                   | 2.06 [1.87-2.27]                                        |
| Both NP and FP                | 3.46 [2.60-4.61]                                                   | 3.43 [2.58-4.57]                                        |

Legend: CI=Confidence interval, NP=Nurse Practitioner, FP=Family Physician, ED=Emergency Department

\*Adjusted for *age, sex, rurality, local health region, chronic conditions, formal home care hours occurring 90-22 days before death, previous hospitalizations and previous inpatient palliative care encounters occurring prior to the last 90 days of life, primary care model, and number of days spent in the community during the last 90 days of life and before the outcome occurred, Activities of Daily Living (ADL) self-performance score, the Changes in Health, End-Stage Disease and Signs and Symptoms (CHESS) Scale, and the Cognitive Performance Scale (CPS), the presence of a live-in caregiver and caregiver distress.*
